# Supplementary material
Source: MDPI journal article supplement (https://www.mdpi.com/2073-4441/14/2/209)
Supplement: s1 [file s1]

## Supporting Information for “Ammonium Nitrogen Streamflow Transport Modelling and Spatial Analysis in two Chinese Basins”

**Table S1.** Summary of water resources of the main rivers in PLB.

| River name                 | Ganjiang | Fuhe  | Xinjiang | Raohe | Xiushui | Total<br>(billion m <sup>3</sup> ) |
|----------------------------|----------|-------|----------|-------|---------|------------------------------------|
| Total water resources      | 89.13    | 20.19 | 21.11    | 15.77 | 16.86   | 163.06                             |
| Surface water resources    | 70.29    | 16.17 | 17.38    | 13.04 | 13.52   | 130.4                              |
| Groundwater resources      | 18.84    | 4.02  | 3.73     | 2.73  | 3.34    | 32.66                              |
| Water delivered to outlets | 81.26    | 16.20 | 18.53    | 14.04 | 12.70   | 142.73                             |

**Table S2.** Summary of water resources of the main rivers in HRB.

| River name                 | Luan | Beisanhe | Yongding | Daqing | Ziya | Zhangweinan Canal | Tuhai-Majia | Total (billion m <sup>3</sup> ) |
|----------------------------|------|----------|----------|--------|------|-------------------|-------------|---------------------------------|
| Total water resources      | 4.67 | 4.38     | 2.49     | 4.65   | 6.36 | 4.41              | 3.32        | 30.30                           |
| Surface water resources    | 3.19 | 2.28     | 1.04     | 1.76   | 2.93 | 2.49              | 1.00        | 14.69                           |
| Groundwater resources      | 3.05 | 3.23     | 2.34     | 3.82   | 5.33 | 3.40              | 2.93        | 24.11                           |
| Water delivered to outlets | 0.92 | 1.05     | —        | 0.64   | 0.34 | —                 | 0.54        | 3.51                            |

**Table S3.** Parameters of GWLF models in PLB.

[illegible]
